# Supplementary material for: Organic heterocyclic molecules become superalkalis
Source: Royal Society of Chemistry journal article supplement (doi:10.1039/c6cp04430a), 2016-01-01
Supplement: c6cp04430a1.pdf [file c6cp04430a1.pdf]

## Organic Heterocyclic Molecules go to Superalkali

G Naresh Reddy<sup>a</sup> and Santanab Giri<sup>a\*</sup>

<sup>a</sup>Department of Chemistry, National Institute of Technology, Rourkela, 769008, India

Corresponding Author: [giris@nitrkl.ac.in](mailto:giris@nitrkl.ac.in)

## Neutral and Cations [At b3lyp/6-31+G(d,p)]

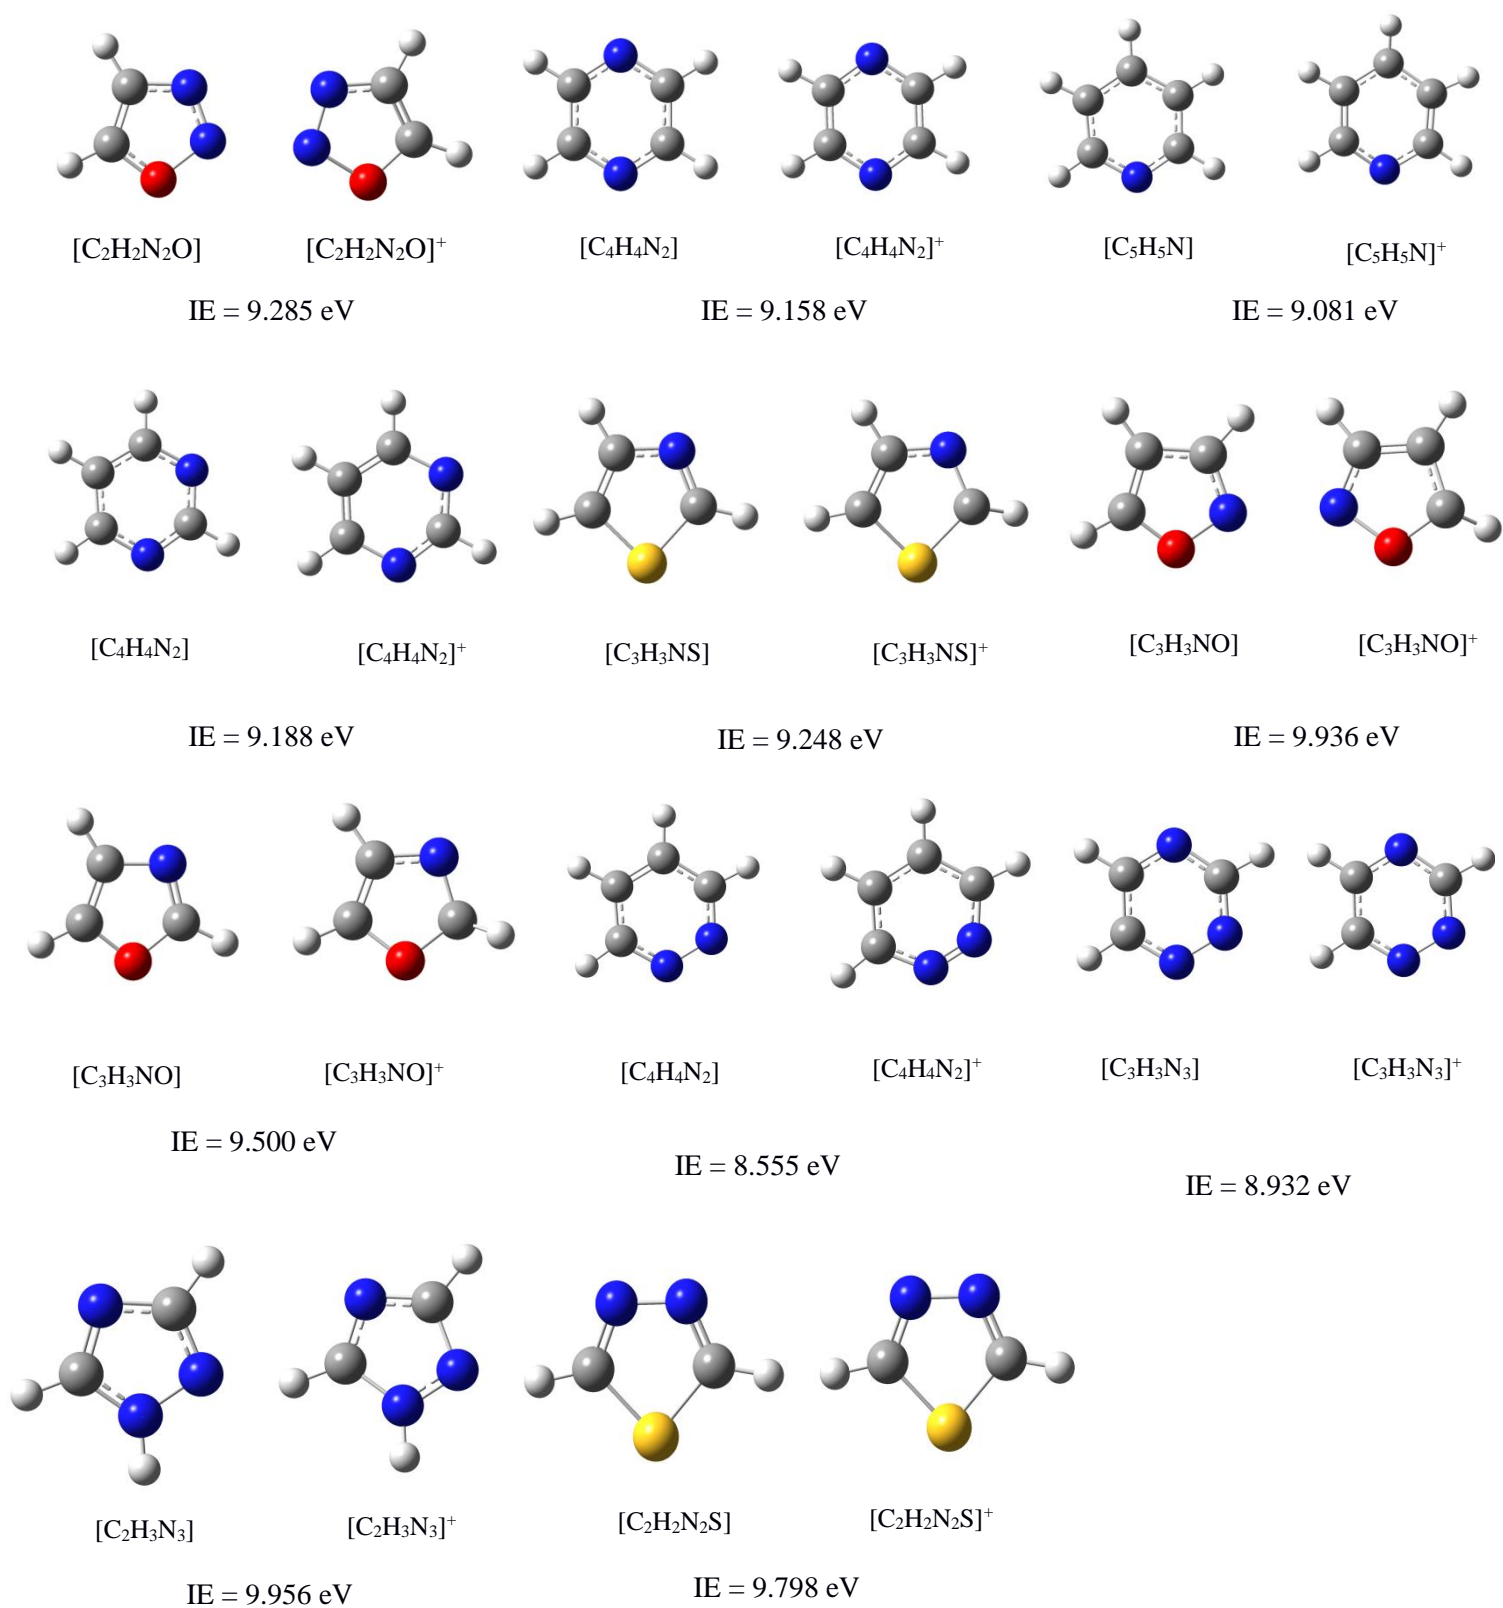

**Figure S-I:** Optimized geometries, Ionization energies of neutral and cations of aromatic heterocyclic molecules.

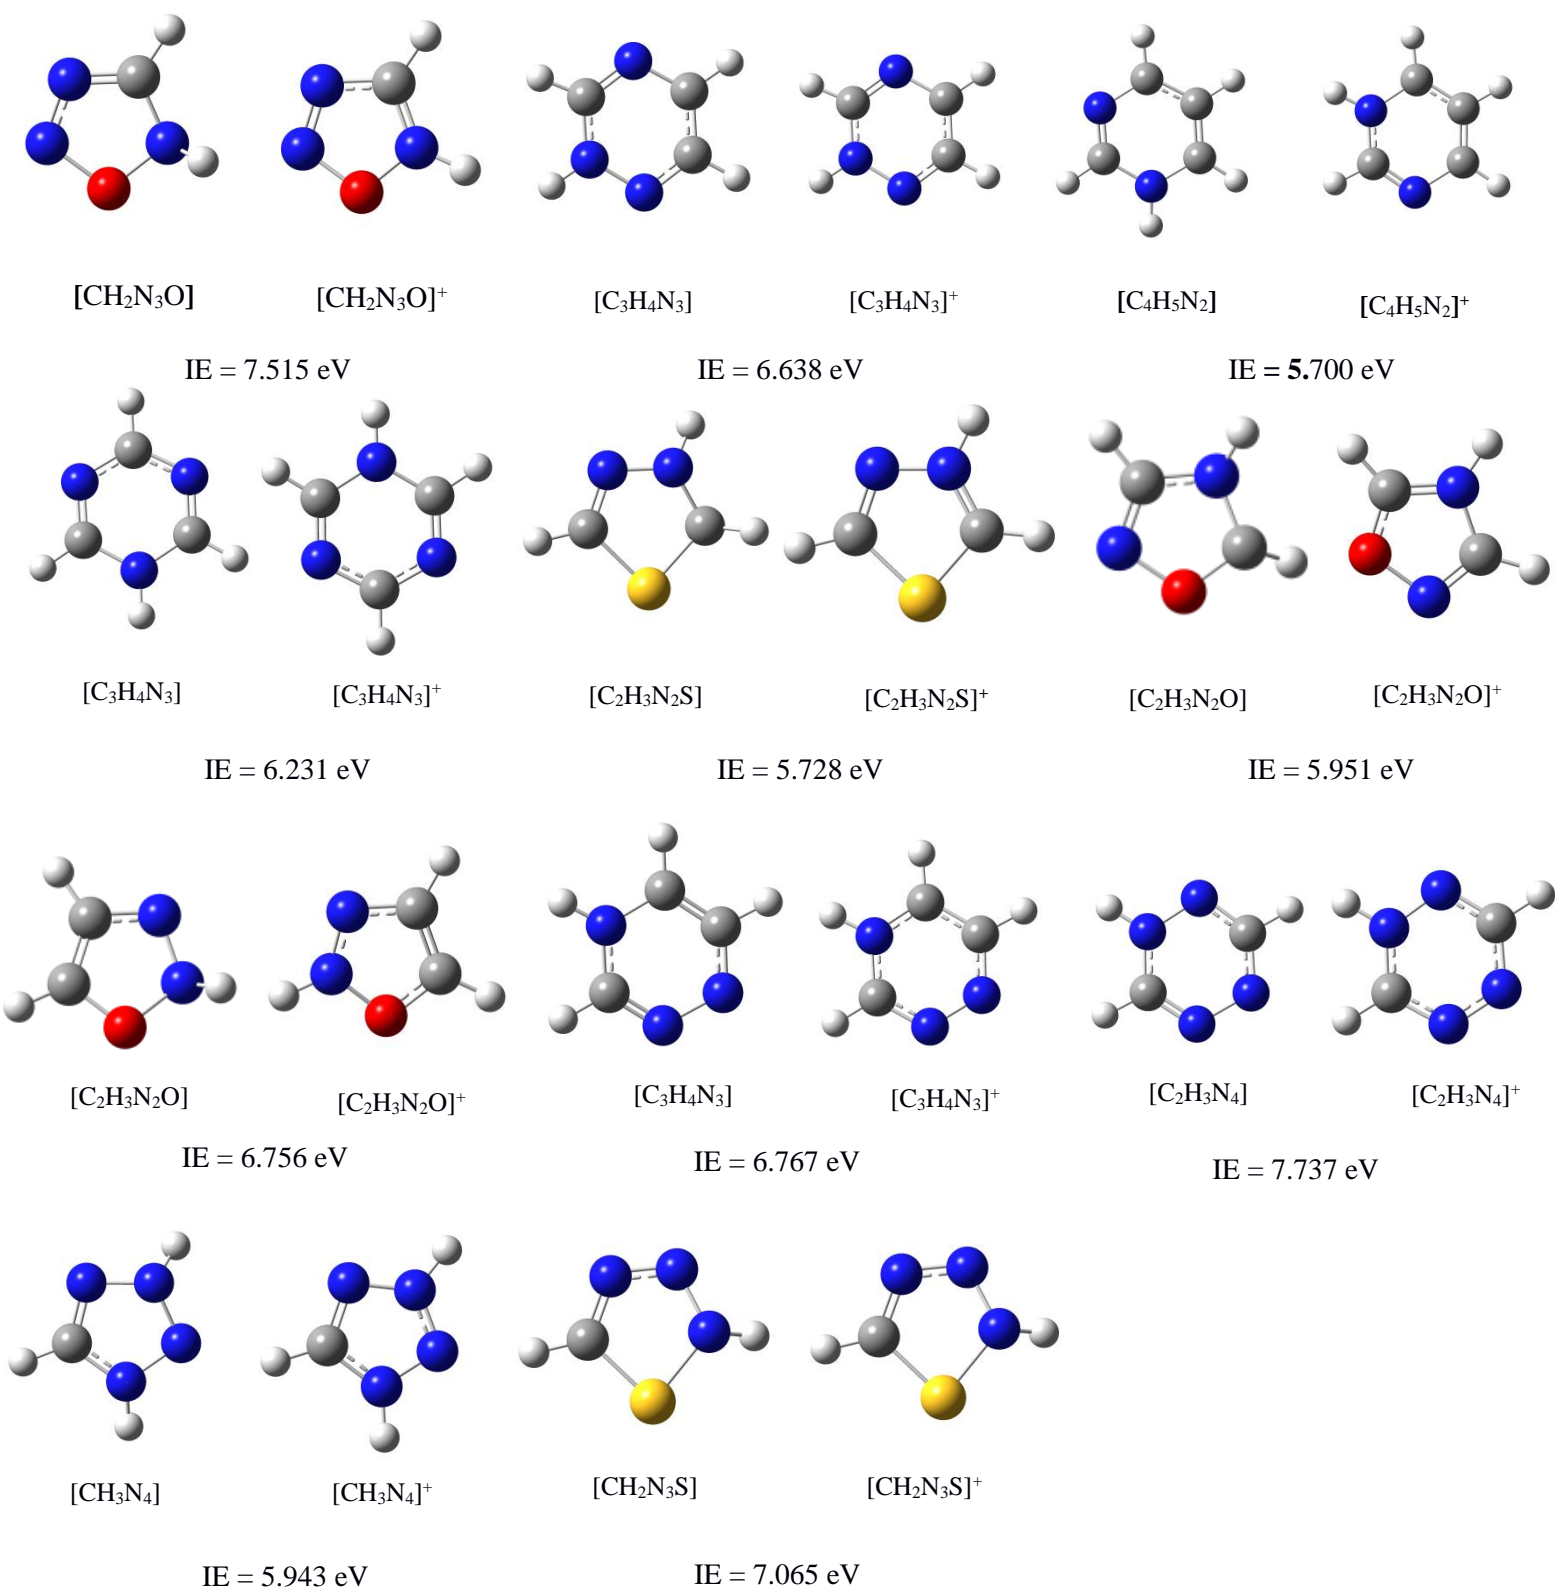

**Figure S-II:** Optimized geometries, Ionization energies of neutral and cations of one C by N substituted aromatic heterocyclic molecules.

### Neutrals

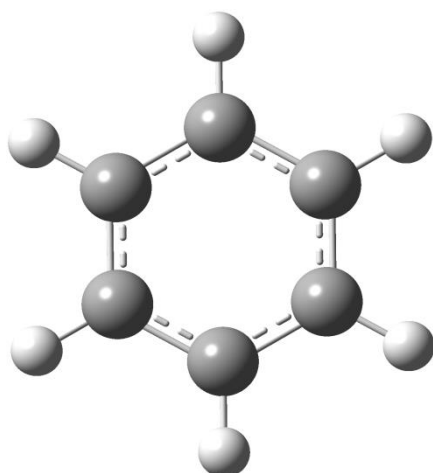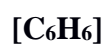

### Cations

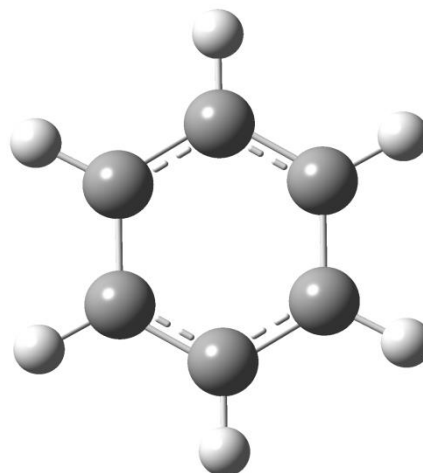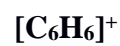

IE = 9.065 eV [at b3lyp/6-31+G(d,p)]

**Figure S-III:** Optimized geometries, Ionization energy of neutral and cation of benzene.

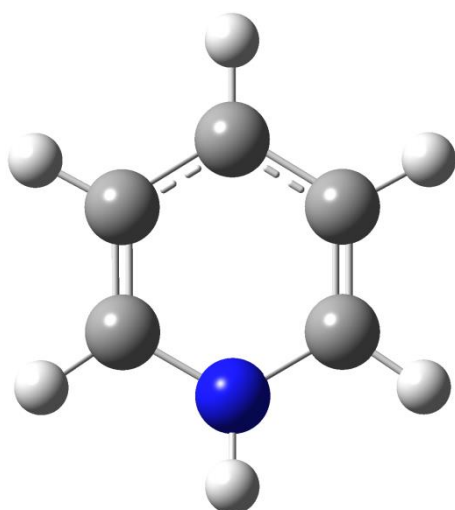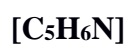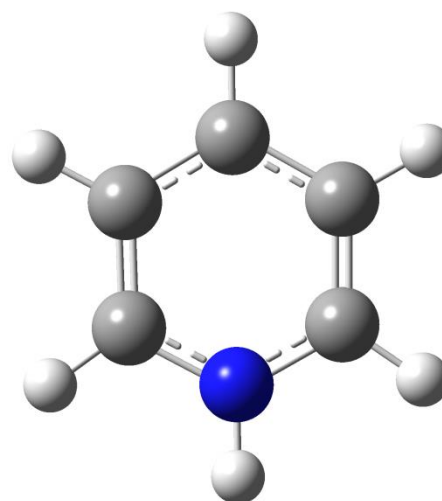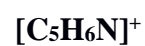

IE = 5.158 eV [at b3lyp/6-31+G(d,p)]

**Figure S-IV:** Optimized geometries, Ionization energy of neutral and cation of [C<sub>5</sub>H<sub>5</sub>N].

## Neutrals

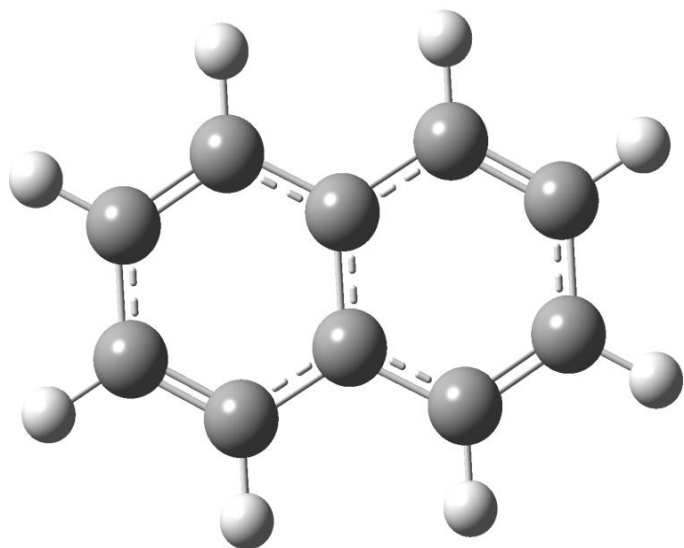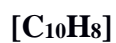

## Cations

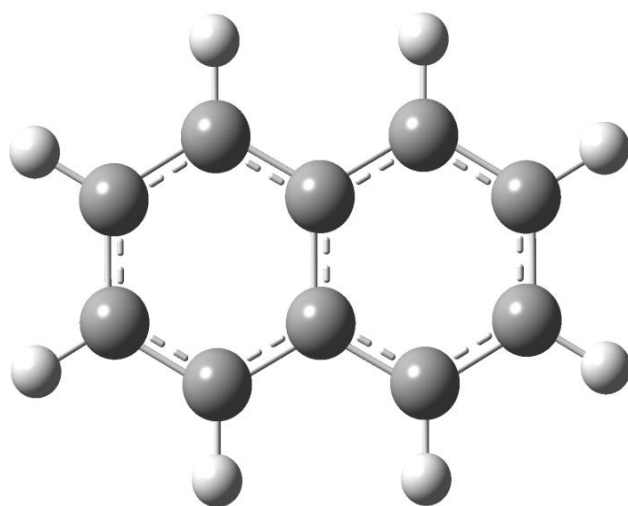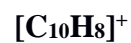

IE = 7.816 eV [at b3lyp/6-31+G(d,p)]

**Figure S-V:** Optimized geometries, Ionization energy of neutral and cation of naphthalene

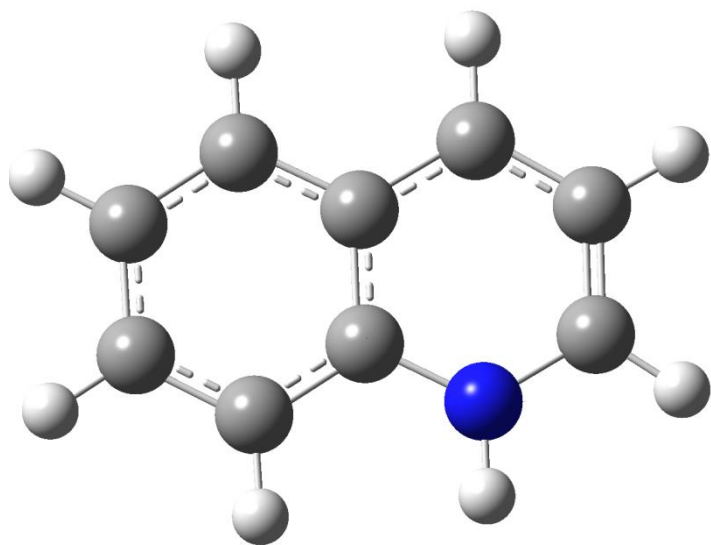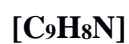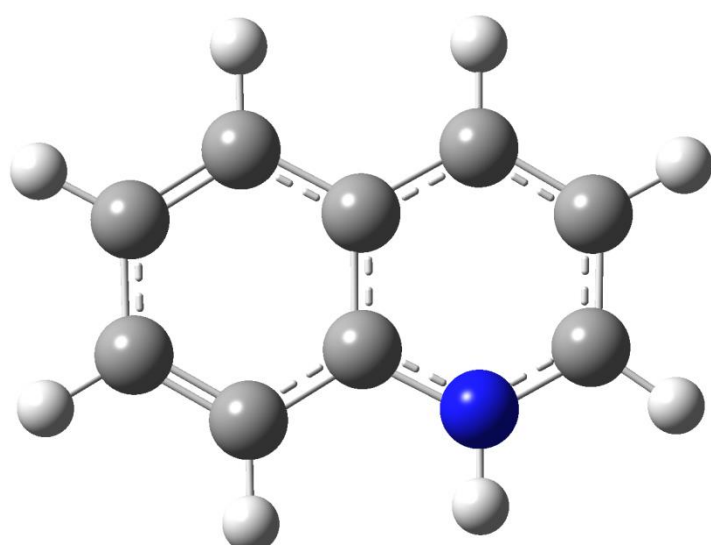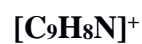

IE = 5.303 eV [at b3lyp/6-31+G(d,p)]

**Figure S-VI:** Optimized geometries, Ionization energy of one C by N substituted neutral and cation of naphthalene.

## Neutrals

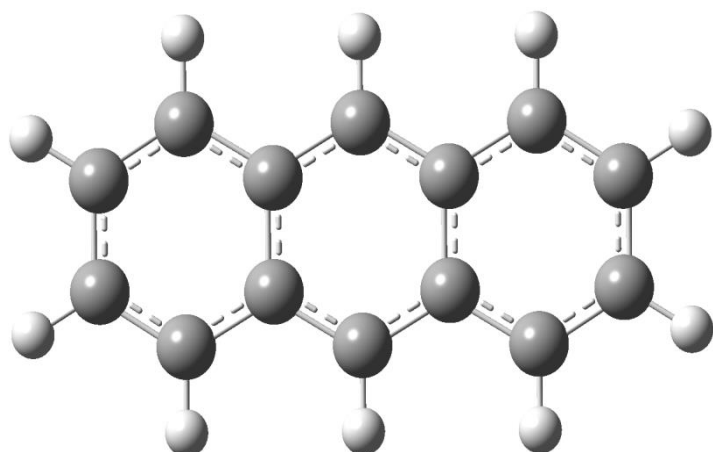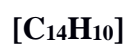

## Cations

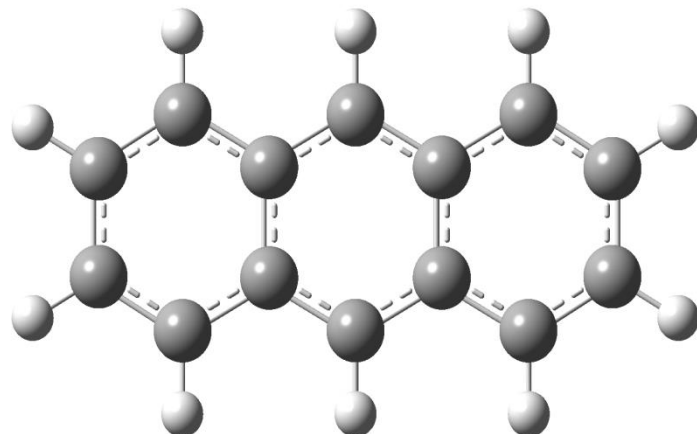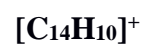

IE = 7.034 eV [at b3lyp/6-31+G(d,p)]

**Figure S-VII:** Optimized geometries, Ionization energy of neutral and cation of anthracene.

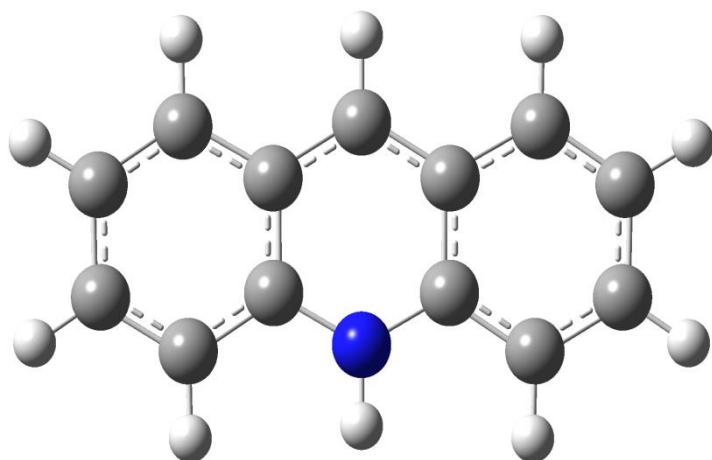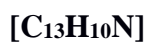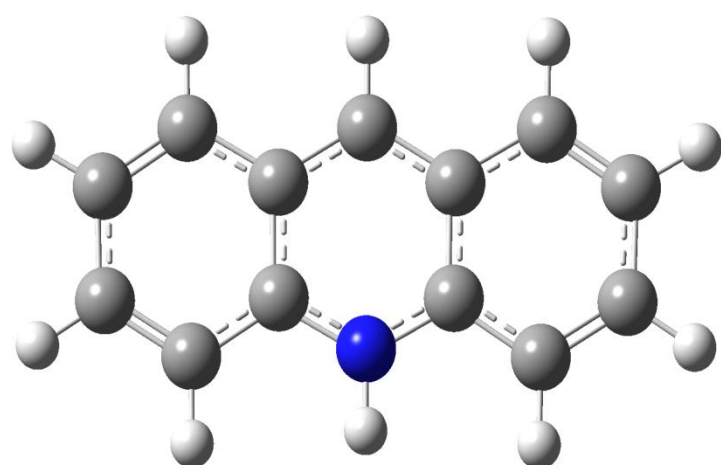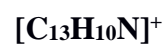

IE = 5.459 eV [at b3lyp/6-31+G(d,p)]

**Figure S-VIII:** Optimized geometries, Ionization energy of one C by N substituted neutral and cation of anthracene.

## Organic Reducing agents

Neutrals

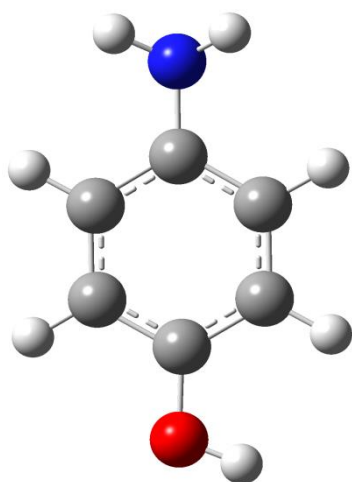

[C<sub>6</sub>H<sub>4</sub>(NH<sub>2</sub>)(OH)]

Cations

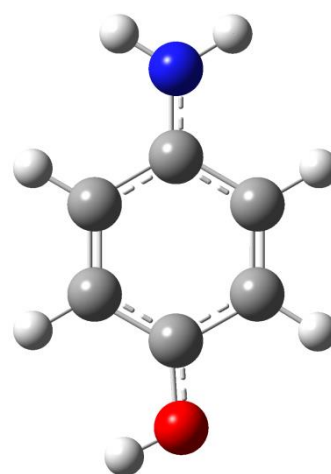

[C<sub>6</sub>H<sub>4</sub>(NH<sub>2</sub>)(OH)]<sup>+</sup>

IE = 6.982 eV [at b3lyp/6-31+G(d,p)]

**Figure S-IX:** Optimized geometries, Ionization energy of neutral and cation of 4-aminophenol

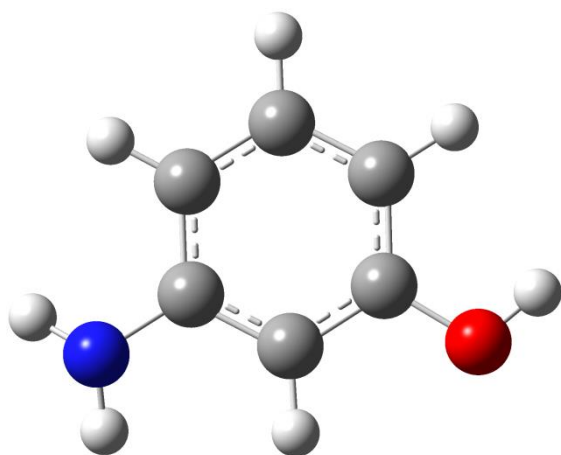

[C<sub>6</sub>H<sub>4</sub>(NH<sub>2</sub>)(OH)]

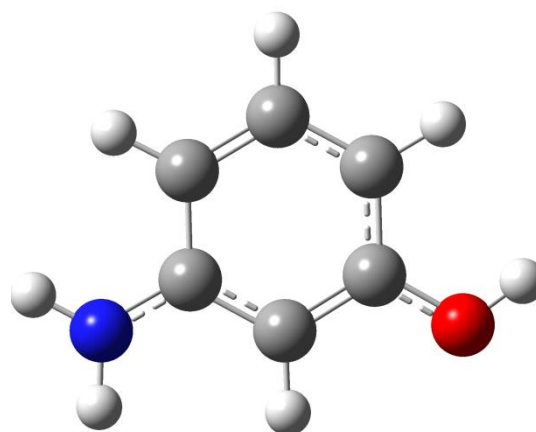

[C<sub>6</sub>H<sub>4</sub>(NH<sub>2</sub>)(OH)]

IE = 7.397 eV [at b3lyp/6-31+G(d,p)]

**Figure S-X:** Optimized geometries, Ionization energy of neutral and cation of 3-aminophenol.

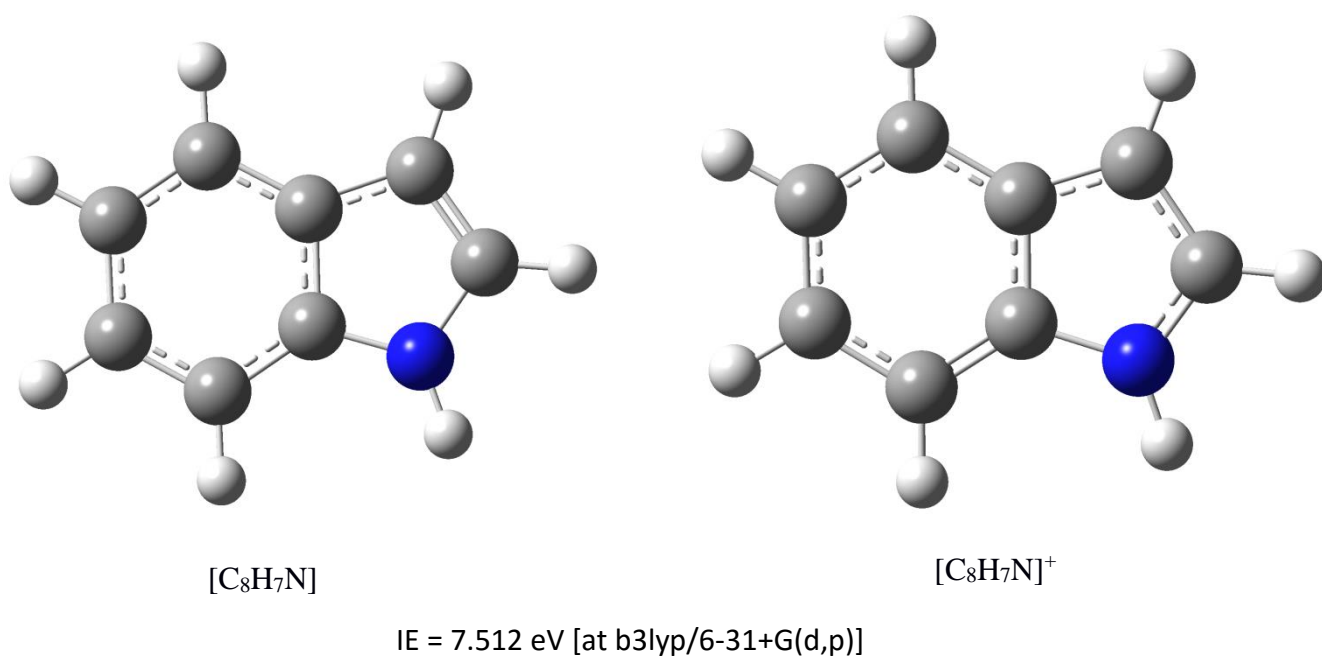

**Figure S-XI:** Optimized geometries, Ionization energy of neutral and cation of indole.

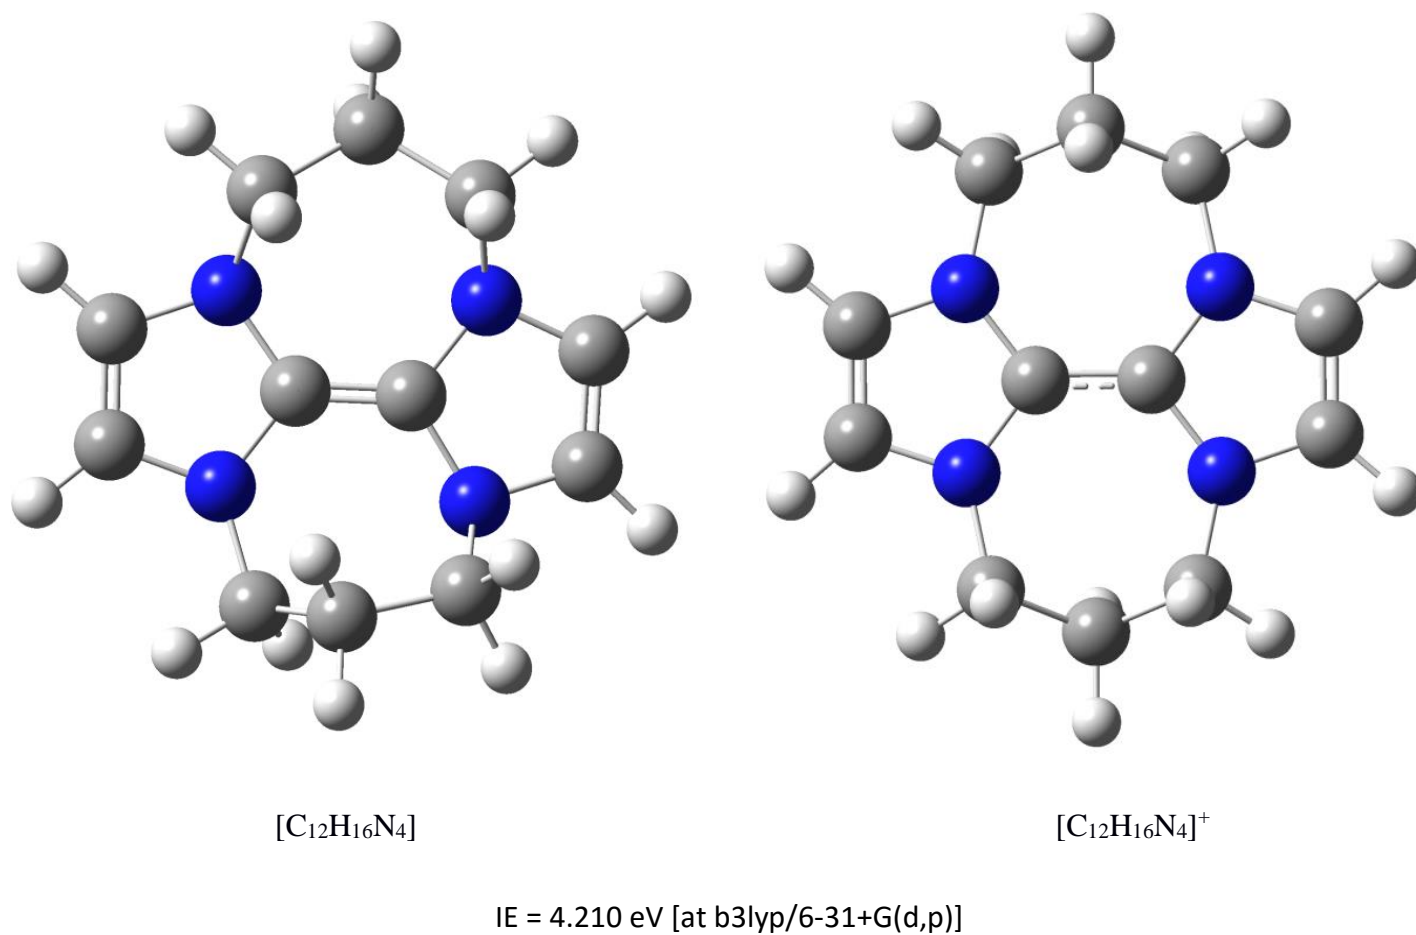

**Figure S-XII:** Optimized geometries, Ionization energy of neutral and cation of  $[C_{12}H_{16}N_4]$ .
